# Supplementary material for: Vitamin C Treatment Rescues Prelamin A-Induced Premature Senescence of Subchondral Bone Mesenchymal Stem Cells
Source: Hindawi journal article supplement (doi:10.1155/2020/3150716), 2020-04-03
Supplement: f1 [file 3150716.f1.pdf]

Figure S1

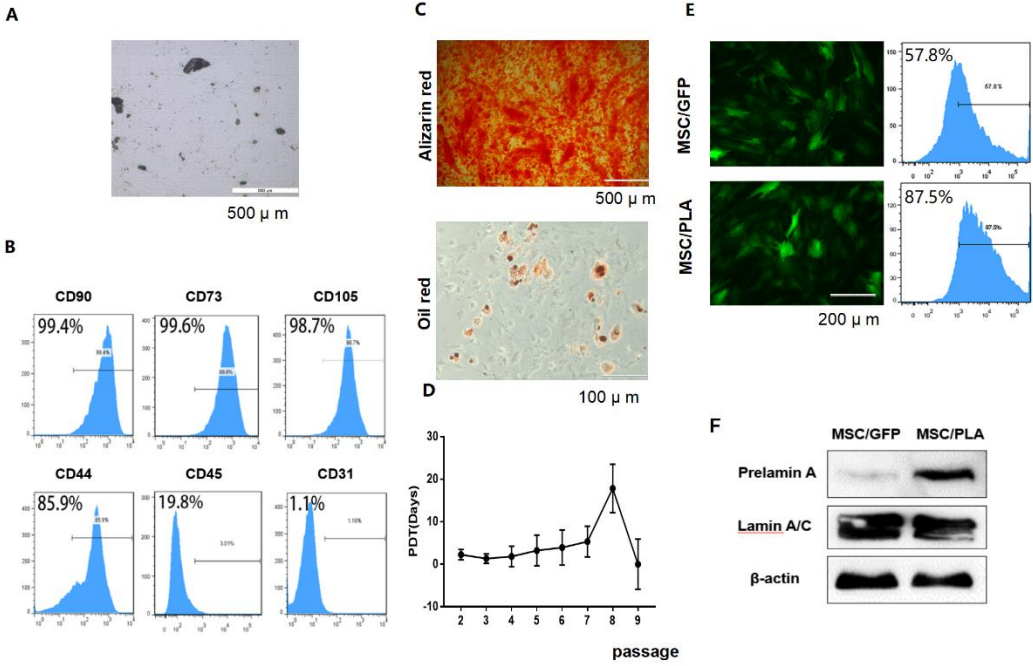

Table S1

**Basic information of the donors**

| Years | gender |  |  |  |  |  |
|-------|--------|--|--|--|--|--|
| 55    | male   |  |  |  |  |  |
| 60    | male   |  |  |  |  |  |
| 52    | femal  |  |  |  |  |  |
| 57    | male   |  |  |  |  |  |
| 55    | femal  |  |  |  |  |  |
|       |        |  |  |  |  |  |
|       |        |  |  |  |  |  |
|       |        |  |  |  |  |  |
|       |        |  |  |  |  |  |

Table S2

**Primers List**

| Oligo Name      | Sequence(5' to 3')              |
|-----------------|---------------------------------|
| F-OCN           | cag gcg cta cct gta tca atg gc  |
| R-OCN           | gcc gat gtg gtc agc caa ctc     |
| F-RUNX2         | aac agc agc agc agc agc ag      |
| R-RUNX2         | gca ccg agc aca gga agt tgg     |
| F-OPN           | agc gag gag ttg aat ggt gca tac |
| R-OPN           | aat ctg gac tgc ttg tgg ctg tg  |
| Hcollagen III-F | tgc tgc tgg tac tcc tgg tct g   |
| Hcollagen III-R | acc tgg acc gcc tgg ttc ac      |
| Hcollagen I-F   | aaa gat gga ctc aac ggt ctc     |
| Hcollagen I-R   | cat cgt gag cct tct ctt gag     |
| H-BCL2 -F       | gac ttc gcc gag atg tcc ag      |
| H-BCL2-R        | gaa ctc aaa gaa ggc cac aat c   |
| H-CASP3-F       | cca aag atc ata cat gga agc g   |
| H-CASP3-R       | ctg aat gtt tcc ctg agg ttt g   |
| H-BAX-F         | cga act gga cag taa cat gga g   |
| H-BAX-R         | cag ttt gct ggc aaa gta gaa a   |
| H-P21-F         | gat gga act tcg act ttg tca c   |
| H-P21-R         | gtc cac atg gtc ttc ctc tg      |
| H-GADD45A-F     | cag atc cac ttc acc ctg atc     |
| H-GADD45A-R     | gat gaa tgt gga ttc gtc acc a   |
| HP16-F          | ggc cga tcc agg tca tga tga tg  |
| HP16-R          | cac cag cgt gtc cag gaa gc      |
| Hp-53-F         | cctcagcatcttatccgagtg           |
| Hp-53-R         | tggatggtgttacagtcagagc          |

---

|                     |                                |
|---------------------|--------------------------------|
| H-CCND1-F           | tct aca ccg aca act cca tcc g  |
| H-CCND1-R           | tct ggc att ttg gag agg aag tg |
| H-CCNE-F            | tgt gtc ctg gat gtt gac tgc c  |
| H-CCNE1-R           | ctc tat gtc gca cca ctg ata cc |
| H-CDK2-F            | atg gat gcc tct gct ctc act g  |
| H-CDK2-R            | ccc gat gag aat ggc aga aag c  |
| H-CDK4-F            | cca tca gca cag ttc gtg agg t  |
| H-CDK4-R            | tca gtt cgg gat gtg gca cag a  |
| H-CDK6-F            | gga taa agt tcc aga gcc tgg ag |
| H-CDK6-R            | gcg atg cac tac tcg gtg tga a  |
| H-IL6-F             | aga cag cca ctc acc tct tca g  |
| H-IL6-R             | ttc tgc cag tgc ctc ttt gct g  |
| H-IL8-F             | gag agt gat tga gag tgg acc ac |
| H-IL8-R             | cac aac cct ctg cac cca gtt t  |
| H-TERF2-F           | gtg gaa aag cca ccc aga gaa c  |
| H-TERF2-R           | tgc aaa ggc tgc ctc aga atc c  |
| H-TERF1-F           | cat gga acc cag caa caa gac c  |
| H-TERF1--R          | ctg ctt tca gtg gct ctt ctg c  |
| H-POT1-F            | cag aac ctg acg aca gct ttc c  |
| H-POT1-R            | gca cat agt ggt gtc ctc tcc a  |
| H-RAP1A-F           | act tac agg acc tga ggg aac ag |
| H-RAP1A-R           | cct gct ctt tgc caa cta ctc g  |
| H-ARID1A -F         | aag cca cca act cca gca tcc a  |
| H-ARID1A -R         | cgc ttc tgg aat gtg gag tca c  |
| H-TINF2-F           | gtcagaggctcctgtggatttg         |
| H-TINF2-R           | gtgtaggcagtgctttctccag         |
| H-TPP1-F            | ggtggcttcagcaatgtgtcc          |
| H-TPP1-R            | gaagtaactggatggtggcagg         |
| H-PPAR- $\gamma$ -F | agcctgcgaaagccttttggtg         |
| H-PPAR- $\gamma$ -R | ggcttcacattcagcaaacctgg        |
| H-CEBPA-F           | aggaggatgaagccaagcagct         |
| H-CEBPA-R           | agtgcgcatctggaactgcag          |

Table S3

---

**Significant changes in the levels of 386 mRNA (193 upregulated, 193 downregulated)**

| ProbeID       | GeneSymbol | Regulation(PLA_vs._CTRL) |
|---------------|------------|--------------------------|
| hsa_bmr020401 | AAMDC      | up                       |
| hsa_gmr049805 | ABCA2      | up                       |
| hsa_gmr043452 | ABCC11     | up                       |
| hsa_gmr016953 | ABCC8      | down                     |
| hsa_gmr065377 | ABCC9      | down                     |
| hsa_gmr038136 | ACSL6      | up                       |
| hsa_gmr041256 | ADAM12     | down                     |
| hsa_gmr024054 | ADAMTS12   | down                     |
| hsa_gmr088550 | ADAMTS14   | down                     |
| hsa_gmr088553 | ADAMTS14   | down                     |
| hsa_gmr088554 | ADAMTS14   | down                     |
| hsa_gmr088555 | ADAMTS14   | down                     |
| hsa_gmr088556 | ADAMTS14   | down                     |
| hsa_gmr088552 | ADAMTS14   | down                     |
| hsa_gmi128679 | ADAMTS14   | down                     |
| hsa_gmr044494 | ADAMTS14   | down                     |
| hsa_gmr088551 | ADAMTS14   | down                     |
| hsa_gmr097776 | ADGRL3     | down                     |
| hsa_gmr079573 | AGBL2      | up                       |
| hsa_gmr021258 | AIF1       | down                     |
| hsa_gmr092496 | ALPL       | down                     |
| hsa_bmr009465 | ALPL       | down                     |
| hsa_gmr000424 | ALPL       | down                     |
| hsa_gmr037728 | ARHGAP11A  | up                       |
| hsa_gmr029105 | ARMC9      | down                     |
| hsa_gmr075586 | ARMC9      | down                     |
| hsa_gmr075585 | ARMC9      | down                     |
| hsa_gmr110205 | ASPSCR1    | up                       |
| hsa_gmr081860 | ATAD5      | up                       |
| hsa_gmr047161 | ATP2A1     | down                     |
| hsa_gmr076350 | ATP8A1     | down                     |
| hsa_gmr110973 | B4GALT6    | up                       |
| hsa_gmi127643 | BAALC      | down                     |
| hsa_gmr004203 | BANK1      | down                     |
| hsa_gmr098060 | BANK1      | down                     |
| hsa_gmr005390 | BANK1      | down                     |
| hsa_gmr014063 | BCL2L13    | up                       |
| hsa_bmr000571 | BDKRB2     | up                       |

---

|               |          |      |
|---------------|----------|------|
| hsa_gmr103644 | BEND7    | up   |
| hsa_gmr008761 | BIRC5    | up   |
| hsa_gmr007757 | BNIP1    | down |
| hsa_gmr092670 | BRINP3   | down |
| hsa_gmr105453 | BRSK2    | down |
| hsa_gmr104579 | C11orf65 | down |
| hsa_gmr086397 | C13orf46 | down |
| hsa_gmr106747 | C2CD5    | down |
| hsa_bmr049840 | C2orf66  | down |
| hsa_gmr075869 | C3orf58  | down |
| hsa_gmr099003 | C5orf63  | down |
| hsa_gmr004611 | C7orf57  | down |
| hsa_gmi050523 | CABLES1  | up   |
| hsa_gmr047054 | CAMKK2   | up   |
| hsa_bmr116289 | CARD17   | down |
| hsa_gmr025644 | CBX7     | up   |
| hsa_gmr064294 | CCDC125  | up   |
| hsa_gmr090360 | CCDC125  | up   |
| hsa_gmr121578 | CCDC125  | up   |
| hsa_gmr119981 | CCDC138  | down |
| hsa_gmr102607 | CCDC171  | up   |
| hsa_gmr040302 | CCHCR1   | up   |
| hsa_gmr018058 | CCL4L2   | down |
| hsa_gmr017750 | CD36     | down |
| hsa_gmi130155 | CDCA3    | up   |
| hsa_gmi136247 | CDCA3    | up   |
| hsa_gmi130156 | CDCA3    | up   |
| hsa_gmi136248 | CDCA3    | up   |
| hsa_gmi136249 | CDCA3    | up   |
| hsa_gmr020534 | CDH10    | down |
| hsa_gmr029837 | CELF4    | up   |
| hsa_gmr090503 | CENPK    | up   |
| hsa_gmr041515 | CENPK    | up   |
| hsa_gmr099166 | CENPK    | up   |
| hsa_gmr099165 | CENPK    | up   |
| hsa_gmr011648 | CIT      | up   |
| hsa_gmr087839 | CIT      | up   |
| hsa_gmi059451 | CLEC12B  | down |
| hsa_gmr029589 | CLEC2L   | down |
| hsa_bmr044171 | CLNK     | up   |
| hsa_gmr017171 | COL4A6   | down |
| hsa_gmr066749 | COMMD7   | up   |
| hsa_gmr042630 | CPEB1    | down |
| hsa_gmr003812 | CPEB1    | down |

---

|               |        |      |
|---------------|--------|------|
| hsa_bmr115625 | CREM   | down |
| hsa_gmr004362 | CRTC1  | up   |
| hsa_bmr047051 | CSF1   | up   |
| hsa_gmr000679 | CSF1   | up   |
| hsa_gmr047049 | CSF1   | up   |
| hsa_gmr091400 | CTSF   | up   |
| hsa_gmr033172 | CTSF   | up   |
| hsa_gmr002966 | CXCL12 | up   |
| hsa_gmr009618 | CXCL12 | up   |
| hsa_bmr049056 | CXCL12 | up   |
| hsa_gmi051784 | DCAF11 | up   |
| hsa_gmr075645 | DGKD   | up   |
| hsa_gmr095689 | DGKD   | up   |
| hsa_gmr075649 | DGKD   | up   |
| hsa_gmr046512 | DGKD   | up   |
| hsa_gmr033045 | DGKD   | up   |
| hsa_gmr063623 | DGKD   | up   |
| hsa_gmr104604 | DLG2   | down |
| hsa_gmr020505 | DLK1   | down |
| hsa_gmr005237 | DMKN   | up   |
| hsa_gmr011688 | DNMT3B | down |
| hsa_gmr068006 | DOK3   | down |
| hsa_gmr099317 | DOK3   | down |
| hsa_gmr031426 | DSG2   | down |
| hsa_gmr002672 | DUT    | up   |
| hsa_gmr005782 | DYSF   | down |
| hsa_gmr005899 | DYSF   | down |
| hsa_gmr067672 | DYSF   | down |
| hsa_gmr067673 | DYSF   | down |
| hsa_gmr005901 | DYSF   | down |
| hsa_gmr005902 | DYSF   | down |
| hsa_gmr005903 | DYSF   | down |
| hsa_gmr005904 | DYSF   | down |
| hsa_gmr005906 | DYSF   | down |
| hsa_gmr005907 | DYSF   | down |
| hsa_gmr005905 | DYSF   | down |
| hsa_gmr005910 | DYSF   | down |
| hsa_gmr032925 | DYSF   | down |
| hsa_gmr005908 | DYSF   | down |
| hsa_bmr030952 | EFNB3  | up   |
| hsa_gmr079424 | EHF    | down |
| hsa_gmr105088 | ELMOD1 | down |
| hsa_gmr071315 | ELOVL7 | down |
| hsa_gmr014113 | EPGN   | down |

---

|               |           |      |
|---------------|-----------|------|
| hsa_gmr014114 | EPGN      | down |
| hsa_gmr014115 | EPGN      | down |
| hsa_gmr014117 | EPGN      | down |
| hsa_gmi054886 | EPGN      | down |
| hsa_gmi054888 | EPGN      | down |
| hsa_gmr120613 | EPHB1     | down |
| hsa_gmr104060 | FAM196A   | down |
| hsa_gmr046166 | FAM213B   | up   |
| hsa_gmr080794 | FANCA     | up   |
| hsa_gmr104524 | FAT3      | down |
| hsa_gmr043314 | FAXDC2    | up   |
| hsa_gmr071331 | FAXDC2    | up   |
| hsa_gmr086372 | FBRSL1    | up   |
| hsa_gmr086370 | FBRSL1    | up   |
| hsa_gmr086366 | FBRSL1    | up   |
| hsa_gmi058504 | FBXO44    | up   |
| hsa_gmr069729 | FLRT1     | down |
| hsa_gmr010297 | FLVCR2    | down |
| hsa_bmr034677 | FRAT1     | up   |
| hsa_gmr013141 | GDAP1L1   | down |
| hsa_gmr117056 | GPR18     | down |
| hsa_gmr031570 | GPX3      | down |
| hsa_gmr024401 | GPX3      | down |
| hsa_bmr105974 | HCFC2     | up   |
| hsa_gmr006332 | HDAC11    | up   |
| hsa_gmr093136 | HHAT      | down |
| hsa_gmr093130 | HHAT      | down |
| hsa_gmr093135 | HHAT      | down |
| hsa_gmr093131 | HHAT      | down |
| hsa_gmr008887 | HHAT      | down |
| hsa_bmr007914 | HIST2H2BF | down |
| hsa_bmr000171 | ICAM1     | down |
| hsa_bmr001818 | IGFBPL1   | down |
| hsa_gmi137035 | IGFL2     | down |
| hsa_gmr075970 | IGSF10    | down |
| hsa_bmr000513 | IL1A      | down |
| hsa_gmr047163 | IL37      | up   |
| hsa_gmr010718 | INMT      | up   |
| hsa_gmi124888 | INTU      | down |
| hsa_gmr002548 | IQCB1     | down |
| hsa_gmr019298 | ISG20     | up   |
| hsa_gmr031723 | ITGA5     | down |
| hsa_gmr116699 | ITGA5     | down |
| hsa_gmr085839 | ITPR1     | down |

---

|               |              |      |
|---------------|--------------|------|
| hsa_gmr076223 | KALRN        | up   |
| hsa_gmr065503 | KDM2B        | up   |
| hsa_gmr026319 | KIDINS220    | up   |
| hsa_gmr026317 | KIDINS220    | up   |
| hsa_bmi128866 | LDB1         | up   |
| hsa_gmi130693 | LINC00452    | down |
| hsa_gmr095929 | LOC105374811 | down |
| hsa_gmi145870 | LOC105374811 | down |
| hsa_gmr095930 | LOC105374811 | down |
| hsa_bmr106765 | LOC107984507 | down |
| hsa_gmr014727 | LRRC20       | up   |
| hsa_gmr086119 | LRRFIP2      | down |
| hsa_gmr070942 | LRRFIP2      | down |
| hsa_gmr070945 | LRRFIP2      | down |
| hsa_gmr070943 | LRRFIP2      | down |
| hsa_gmi059259 | LRTOMT       | up   |
| hsa_gmr049344 | MAP3K3       | up   |
| hsa_gmr031919 | MAP3K3       | up   |
| hsa_gmr074443 | MARC2        | up   |
| hsa_gmr025157 | MARC2        | up   |
| hsa_bmr037113 | METTL7A      | up   |
| hsa_gmr107330 | MIPOL1       | up   |
| hsa_gmr107320 | MIPOL1       | up   |
| hsa_gmr086788 | MMS22L       | up   |
| hsa_bmr018924 | MORN1        | up   |
| hsa_gmi054661 | MS4A14       | down |
| hsa_gmr074457 | MSTO1        | up   |
| hsa_gmr024813 | MTA3         | up   |
| hsa_gmr015928 | MTA3         | up   |
| hsa_gmr024815 | MTA3         | up   |
| hsa_gmr120256 | MTA3         | up   |
| hsa_gmi141756 | MTBP         | up   |
| hsa_gmr102357 | MTSS1        | up   |
| hsa_gmr091225 | MYO7A        | down |
| hsa_gmr117148 | N4BP2L1      | up   |
| hsa_gmr075215 | NCKAP5       | down |
| hsa_gmr010835 | NCR2         | down |
| hsa_gmr063470 | NECTIN4      | down |
| hsa_gmr074646 | NECTIN4      | down |
| hsa_gmr091964 | NLRP3        | up   |



---

|               |         |      |
|---------------|---------|------|
| hsa_gmr033860 | NOTCH4  | down |
| hsa_gmr037063 | NRG2    | up   |
| hsa_gmr071109 | NSD2    | up   |
| hsa_gmr072015 | OBP2B   | down |
| hsa_gmr002122 | OLA1    | up   |
| hsa_gmr007244 | OPRM1   | down |
| hsa_bmr001516 | OR2B3   | down |
| hsa_bmr001456 | OR52I1  | down |
| hsa_bmr046751 | OR5P2   | down |
| hsa_gmr108722 | OTOA    | down |
| hsa_gmi056341 | P4HA3   | down |
| hsa_gmr017318 | P4HA3   | down |
| hsa_gmr119523 | PCBP3   | down |
| hsa_gmr015250 | PCED1B  | down |
| hsa_gmr068756 | PCED1B  | down |
| hsa_gmr106696 | PCED1B  | down |
| hsa_gmr111487 | PDE4A   | up   |
| hsa_gmr035335 | PDE4A   | up   |
| hsa_gmr006266 | PIK3IP1 | up   |
| hsa_gmr044102 | PIK3IP1 | up   |
| hsa_gmr118195 | PIK3R6  | down |
| hsa_gmr002007 | PIK3R6  | down |
| hsa_gmr082631 | PINLYP  | down |
| hsa_gmr116403 | PKNOX2  | down |
| hsa_gmr041434 | PKNOX2  | down |
| hsa_gmr116404 | PKNOX2  | down |
| hsa_gmr116405 | PKNOX2  | down |
| hsa_gmr116407 | PKNOX2  | down |
| hsa_gmr072495 | PKNOX2  | down |
| hsa_gmr090187 | PKNOX2  | down |
| hsa_gmr069291 | PKNOX2  | down |
| hsa_gmr105165 | PKNOX2  | down |
| hsa_gmr090186 | PKNOX2  | down |
| hsa_gmr090185 | PKNOX2  | down |
| hsa_gmr002731 | PLEKHG1 | down |
| hsa_gmr043570 | PLXDC2  | down |
| hsa_gmr014208 | PPME1   | down |
| hsa_gmi139335 | PPME1   | down |
| hsa_gmr105033 | PPME1   | down |
| hsa_gmi135872 | PPP2R2D | up   |
| hsa_gmr041485 | PRDM16  | up   |
| hsa_gmr114737 | PRKAR2B | up   |
| hsa_gmi052996 | PTPN7   | up   |
| hsa_gmr102978 | PTPRD   | down |

---

|               |         |      |
|---------------|---------|------|
| hsa_gmr102967 | PTPRD   | down |
| hsa_gmr121031 | PXYLP1  | up   |
| hsa_gmr046096 | PXYLP1  | up   |
| hsa_gmr097443 | PXYLP1  | up   |
| hsa_gmr002456 | RAB28   | up   |
| hsa_gmr022978 | RALGPS1 | up   |
| hsa_gmr093030 | RALGPS2 | up   |
| hsa_gmr046388 | RALGPS2 | up   |
| hsa_gmr016510 | RALGPS2 | up   |
| hsa_gmr074446 | RALGPS2 | up   |
| hsa_gmr070341 | RALGPS2 | up   |
| hsa_gmr104447 | RASGRP2 | down |
| hsa_gmr047241 | REM2    | down |
| hsa_gmr089680 | RNF220  | down |
| hsa_gmr100305 | ROS1    | down |
| hsa_gmr095339 | SCN2A   | down |
| hsa_gmr084208 | SEC14L6 | down |
| hsa_gmr074565 | SEMA4A  | up   |
| hsa_gmr033011 | SEMA7A  | down |
| hsa_gmr007516 | SEMA7A  | down |
| hsa_gmr007515 | SEMA7A  | down |
| hsa_gmr103009 | SET     | up   |
| hsa_bmr014484 | SETMAR  | up   |
| hsa_gmr067646 | SFTPFB  | down |
| hsa_bmr007214 | SHISA9  | down |
| hsa_gmr065294 | SIRT3   | up   |
| hsa_gmr080526 | SLC24A1 | up   |
| hsa_gmr014247 | SLC2A8  | up   |
| hsa_gmr000896 | SLC2A9  | up   |
| hsa_bmr041905 | SMIM2   | down |
| hsa_gmr075121 | SNED1   | up   |
| hsa_gmr110382 | SPECC1  | down |
| hsa_gmr076646 | SPEF2   | up   |
| hsa_gmi124065 | SSUH2   | down |
| hsa_gmr067757 | STAB1   | down |
| hsa_gmi125521 | STARD4  | down |
| hsa_gmi058616 | STARD4  | down |
| hsa_gmr019909 | STARD4  | down |
| hsa_gmr019907 | STARD4  | down |
| hsa_gmr019906 | STARD4  | down |
| hsa_gmr019904 | STARD4  | down |
| hsa_gmi058615 | STARD4  | down |
| hsa_gmr121545 | STARD4  | down |
| hsa_gmr098638 | STARD4  | down |

---

|               |         |      |
|---------------|---------|------|
| hsa_gmr066269 | STAT5A  | up   |
| hsa_gmr098091 | STK32B  | down |
| hsa_gmr098092 | STK32B  | down |
| hsa_gmr039594 | SUSD4   | down |
| hsa_gmr072702 | SYT1    | down |
| hsa_gmr105457 | SYT12   | up   |
| hsa_gmr083159 | TCF3    | up   |
| hsa_gmr028429 | TCF3    | up   |
| hsa_gmr111691 | TCF3    | up   |
| hsa_gmr119133 | TCF3    | up   |
| hsa_gmi137105 | TCF3    | up   |
| hsa_gmr119130 | TCF3    | up   |
| hsa_gmr091921 | TDRKH   | up   |
| hsa_gmr099143 | TENM2   | down |
| hsa_gmr097186 | TFDP2   | up   |
| hsa_gmr010368 | TGFBR3  | up   |
| hsa_gmr028272 | TIA1    | up   |
| hsa_gmi062133 | TIA1    | up   |
| hsa_gmr041420 | TIA1    | up   |
| hsa_gmi062121 | TIA1    | up   |
| hsa_gmr028257 | TIA1    | up   |
| hsa_gmr013420 | TMEM218 | down |
| hsa_gmr096898 | TMEM45A | down |
| hsa_gmr027732 | TPK1    | up   |
| hsa_gmr027712 | TPK1    | up   |
| hsa_gmr027713 | TPK1    | up   |
| hsa_gmr027715 | TPK1    | up   |
| hsa_gmr041585 | TPK1    | up   |
| hsa_gmr027717 | TPK1    | up   |
| hsa_gmr027719 | TPK1    | up   |
| hsa_gmr027720 | TPK1    | up   |
| hsa_gmr027711 | TPK1    | up   |
| hsa_gmr027723 | TPK1    | up   |
| hsa_gmr027724 | TPK1    | up   |
| hsa_gmr027729 | TPK1    | up   |
| hsa_gmr027730 | TPK1    | up   |
| hsa_gmr027731 | TPK1    | up   |
| hsa_gmr027733 | TPK1    | up   |
| hsa_gmr027721 | TPK1    | up   |
| hsa_gmr100921 | TPK1    | up   |
| hsa_gmr077617 | TPK1    | up   |
| hsa_gmi061852 | TPK1    | up   |
| hsa_gmr114624 | TPK1    | up   |
| hsa_gmr114625 | TPK1    | up   |

---

|               |         |      |
|---------------|---------|------|
| hsa_gmr003479 | TPK1    | up   |
| hsa_gmr003480 | TPK1    | up   |
| hsa_gmi061851 | TPK1    | up   |
| hsa_gmr077622 | TPK1    | up   |
| hsa_gmr077618 | TPK1    | up   |
| hsa_gmr077613 | TPK1    | up   |
| hsa_gmr077614 | TPK1    | up   |
| hsa_gmr077612 | TPK1    | up   |
| hsa_gmr064653 | TPK1    | up   |
| hsa_gmr027706 | TPK1    | up   |
| hsa_gmr027707 | TPK1    | up   |
| hsa_gmr027710 | TPK1    | up   |
| hsa_gmr100914 | TPK1    | up   |
| hsa_gmr100919 | TPK1    | up   |
| hsa_gmr100920 | TPK1    | up   |
| hsa_gmi054939 | TPRA1   | up   |
| hsa_gmr040066 | TREM1   | down |
| hsa_gmr076937 | TREM1   | down |
| hsa_gmr076936 | TREM1   | down |
| hsa_bmr036264 | TRH     | up   |
| hsa_bmr092844 | TRIM67  | up   |
| hsa_gmi128071 | TRMT10B | up   |
| hsa_gmr003714 | TSEN34  | down |
| hsa_gmr120393 | TSGA10  | down |
| hsa_gmr026377 | TSGA10  | down |
| hsa_gmr091884 | TXNIP   | up   |
| hsa_gmr020274 | TXNIP   | up   |
| hsa_gmr033303 | USP13   | up   |
| hsa_gmr003431 | USP44   | down |
| hsa_gmr048606 | VAPA    | up   |
| hsa_gmr044463 | VCAM1   | up   |
| hsa_gmr010927 | VCAM1   | up   |
| hsa_gmr003790 | VCAM1   | up   |
| hsa_gmi145979 | VIPR1   | down |
| hsa_gmi059110 | VTI1A   | down |
| hsa_gmr078677 | WHRN    | up   |
| hsa_gmr025684 | WHRN    | up   |
| hsa_gmr084210 | WNT7B   | down |
| hsa_gmr085555 | XDH     | down |
| hsa_gmr104347 | ZFAND4  | up   |
| hsa_gmr009579 | ZFX     | up   |
| hsa_gmr069111 | ZNF326  | up   |
| hsa_gmr111147 | ZNF418  | up   |
| hsa_bmr111453 | ZNF880  | up   |

---
